# Supplementary material for: Genetic Imbalance in Patients with Cervical Artery Dissection
Source: PubMed Central journal article supplement — Curr Genomics. 2017 Apr;18(2):206–13. doi: 10.2174/1389202917666160805152627 (PMC5345335; doi:10.2174/1389202917666160805152627), 2017-04
Supplement: CG-18-206_SD1.pdf [file CG-18-206_SD1.pdf]

## Supplementary Material

### Genetic Imbalance in Patients with Cervical Artery Dissection

Caspar Grond-Ginsbach<sup>1,\*</sup>, Bowang Chen<sup>2</sup>, Michael Krawczak<sup>3</sup>, Rastislav Pjontek<sup>4</sup>, Philip Ginsbach<sup>5</sup>, Yanxiang Jiang<sup>6</sup>, Shérine Abboud<sup>7</sup>, Marie-Luise Arnold<sup>1</sup>, Anna Bersano<sup>8</sup>, Tobias Brandt<sup>9</sup>, Valeria Caso<sup>10</sup>, Stéphanie Debette<sup>11</sup>, Martin Dichgans<sup>12,13</sup>, Andreas Geschwendtner<sup>12</sup>, Giacomo Giacalone<sup>14</sup>, Juan-José Martín<sup>15</sup>, Antti J. Metso<sup>16</sup>, Tiina M. Metso<sup>16</sup>, Armin J. Grau<sup>17</sup>, Manja Kloss<sup>1</sup>, Christoph Lichy<sup>18</sup>, Alessandro Pezzini<sup>19</sup>, Christopher Traenka<sup>20</sup>, Stefan Schreiber<sup>21</sup>, Vincent Thijs<sup>22</sup>, Emmanuel Touzé<sup>23,24</sup>, Elisabetta Del Zotto<sup>25</sup>, Turgut Tatlisumak<sup>16,26,27</sup>, Didier Leys<sup>28</sup>, Philippe A. Lyrer<sup>20</sup>, Stefan T. Engelter<sup>20,29</sup> for the CADISP group.

<sup>1</sup>Department of Neurology, Heidelberg University Hospital, Heidelberg, Germany; <sup>2</sup>Department of Biology, South University of Science and Technology of China, Shenzhen, China; <sup>3</sup>Institute of Medical Informatics and Statistics, Christian-Albrechts University of Kiel, Kiel, Germany; <sup>4</sup>Department of Neuroradiology, University of Aachen, Aachen, Germany; <sup>5</sup>School of Informatics, University of Edinburgh, United Kingdom; <sup>6</sup>Department of Gynecology and Obstetrics, University of Heidelberg, Heidelberg, Germany; <sup>7</sup>Laboratory of Experimental Neurology, Université Libre de Bruxelles, Brussels, Belgium; <sup>8</sup>Cerebrovascular Unit IRCCS Foundation C.Besta Neurological Institute, via Celoria 11, Milan, Italy; <sup>9</sup>Clinics for Neurologic Rehabilitation, Kliniken Schmieder, Heidelberg, Germany; <sup>10</sup>Stroke Unit, Perugia University Hospital, Perugia, Italy; <sup>11</sup>Department of Neurology, Hôpital Lariboisière, Paris, France; <sup>12</sup>Institute for Stroke and Dementia Research, Klinikum der Universität München, Ludwig Maximilians Universität, Munich, Germany; <sup>13</sup>Munich Cluster of Systems Neurology (SyNergy), Munich Germany; <sup>14</sup>Department of Neurology, Milan, San Raffaele University Hospital, Milan, Italy; <sup>15</sup>Department of Neurology, Sanatorio Allende, Cordoba, Argentina; <sup>16</sup>Department of Neurology, Helsinki University Central Hospital, Helsinki, Finland; <sup>17</sup>Department of Neurology, Klinikum Ludwigshafen, Ludwigshafen, Germany; <sup>18</sup>Department of Neurology, Klinikum Memmingen, Memmingen, Germany; <sup>19</sup>Department of Clinical and Experimental Sciences, Neurology Clinic, University of Brescia, Brescia, Italy; <sup>20</sup>Department of Neurology and Stroke Center, Basel University Hospital, Basel, Switzerland; <sup>21</sup>Department of Internal Medicine, University Hospital Schleswig Holstein, Kiel, Germany; <sup>22</sup>Vesalius Research Center, Experimental Neurology - Laboratory of Neurobiology, Leuven, Belgium; <sup>23</sup>Paris Descartes University, INSERM UMR S894, Department of Neurology, Sainte-Anne Hospital, Paris, France; <sup>24</sup>University of Caen Basse Normandie, INSERM U919, Department of Neurology, CHU Côte de Nacre, Caen, France; <sup>25</sup>Department of Recovery and Functional Rehabilitation, IRCCS Don Gnocchi Foundation, Milan, Italy; <sup>26</sup>Institute of Neuroscience and Physiology, The Sahlgrenska Academy, University of Gothenburg, Gothenburg, Sweden; <sup>27</sup>Department of Neurology, Sahlgrenska University Hospital, Gothenburg, Sweden; <sup>28</sup>INSERM U 1171. University hospital of Lille. Department of Neurology. Lille, France; <sup>29</sup>Neurorehabilitation Unit, University Center for Medicine of Aging and Rehabilitation, Felix Platter-Spital, Basel, Switzerland <sup>\*</sup>Appendix: CADISP (Cervical Artery Dissections and Ischemic Stroke Patients) Co-investigators

#### 1. CADISP (Cervical Artery Dissections and Ischemic Stroke Patients) Co-investigators:

Massimo Pandolfo, MD PhD, Department of Neurology, Erasmus University Hospital, Brussels and Laboratory of Experimental Neurology, ULB, Brussels, Belgium; Marie Bodenant, MD, Department of Neurology, Lille University Hospital – EA1046, France; Fabien Louillet, MD and Jean-Louis Mas, MD PhD, Department of Neurology, Sainte-Anne University Hospital, Paris, France; Sandrine Deltour, MD and Anne Léger, MD, Department of Neurology, Pitié-Salpêtrière University Hospital, Paris, France; Sandrine Canaple, MD and Olivier Godefroy, MD PhD, Department of Neurology, Amiens University Hospital, France; Yannick Béjot, MD PhD, Department of Neurology, Dijon University Hospital, France; Thierry Moulin, MD PhD and Fabrice Vuillier, MD, Department of Neurology, Besançon University Hospital, France; Michael Dos Santos, MD, Department of Neurology, University Hospital of Ludwigshafen, Germany; Rainer Malik, MD PhD, Department of Neurology, University Hospital of Munich, Germany; Ingrid Hausser, PhD, Department of Dermatology, Heidelberg University Hospital, Germany; Constanze Thomas-Feles, MD and Ralf Weber, MD, Department of Neurology, SRH Kurpfalzkrankenhaus, Heidelberg, Germany; Alessia Giossi, MD, Paolo Costa, MD, Andrea Morotti, MD, Loris Poli, MD and Alessandro Padovani, MD PhD, Department of Clinical and Experimental Sciences, Neurology Clinic, University of Brescia, Italy; Maria Sessa, MD, Silvia Lanfranconi, MD, Pierluigi Baron, MD PhD, Department of Neurology, Milan University Hospital, Italy; Carlo Ferrarese, MD PhD, University of Milano Bicocca, San Gerardo Hospital, Monza, Italy; Giacomo Giacalone, MD, Milan Scientific Institute San Raffaele University Hospital, Italy; Stefano Paolucci, MD PhD, Department of Rehabilitation, Santa Lucia Hospital, Rome, Italy; Felix Fluri, MD, Florian Hatz, MD, Dominique Gisler, MD, Margareth Amort, MD, Leo H Bonati, MD, Henrik Gensicke, MD, Department of Neurology, Basel University Hospital, Switzerland; Steve Bevan, PhD, Clinical Neuroscience, St George's University of London, UK; Ayse Altintas, MD PhD, Department of Neurology, University Hospital of Istanbul, Turkey.

**2. Validation of 10 randomly selected CNV findings by Sybr Green quantitative PCR.** Box plots visualize delta-delta values for patient and three control individuals (six replicas). + indicates putative duplication (gain), - indicates putative deletion (loss).

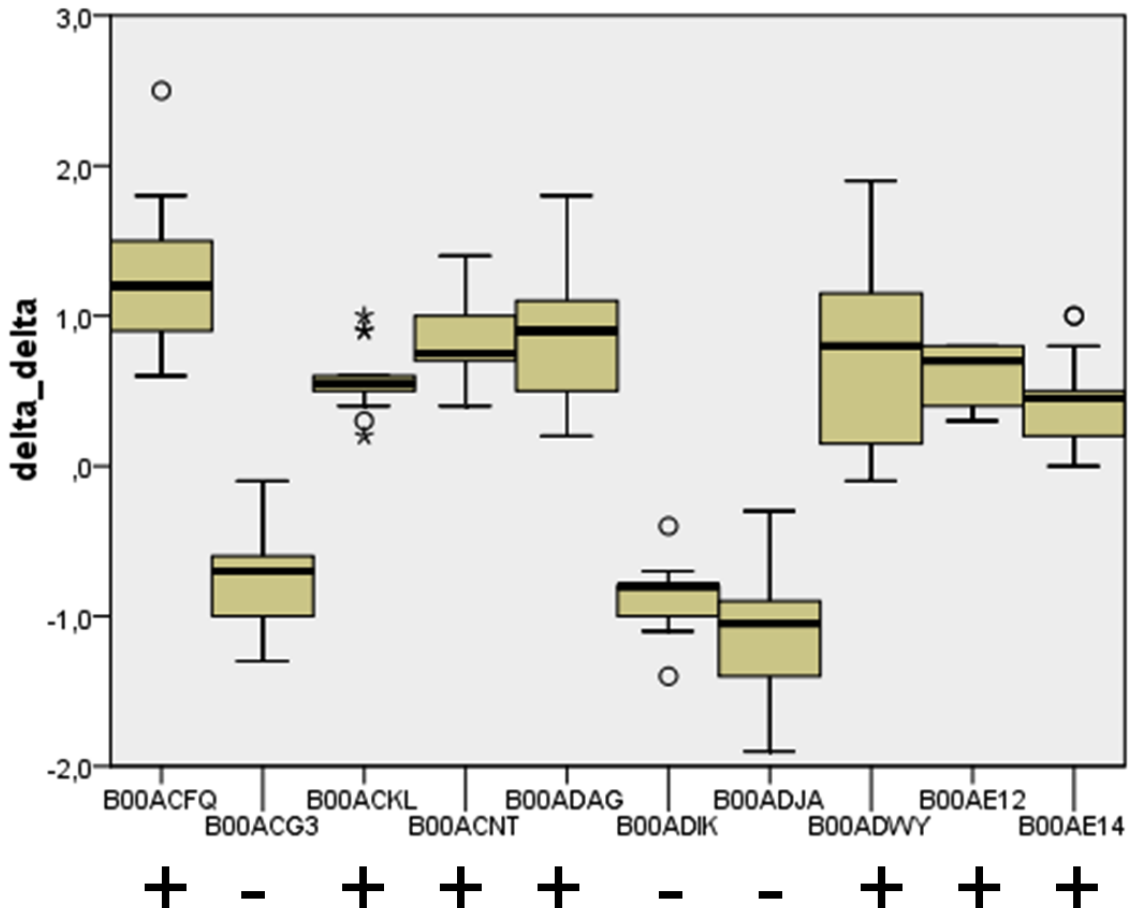

**3. Validation of 5 randomly selected CNV findings by PCR-amplification and sequencing analysis of breakpoint-joining fragments.**

1. Visual inspection of putative deletion in patient B00ADZH with noise-free-CNV software [16].  
(start-SNP: 8:13,968,625; end-SNP: 8:14,086,273 – positions according to GRCh37.p13)

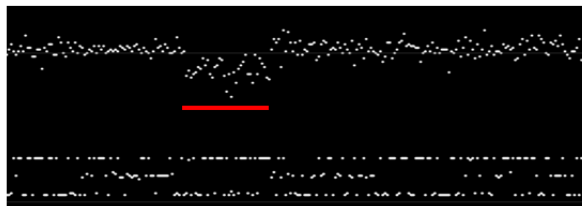

LogR Ratio (signal intensities)  
 Bar ( — ) indicates deletion harboring SNPs with reduced signal intensities and loss of heterozygosity  
 Minor allele frequencies

2. Identify breakpoints-joining region by PCR amplification.

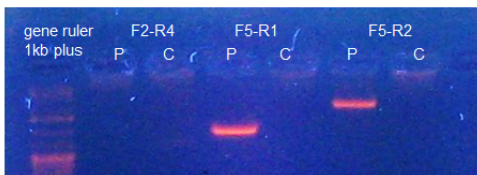

Six different sequences upstream of the first SNP within the putative deletion were used as forward primers. Six sequences downstream of the end SNP were used as reversed primer. 36 combinations of primers were tested by PCR of DNA from patients (P) and referents (C). DNA fragments between primers F5 and R1 or R2 appear to cover the deletion breakpoint.

3. Compare sequence of joining fragment with reference sequence to identify deletion breakpoints at positions 8:13,966,251 and 8:14,087,785.

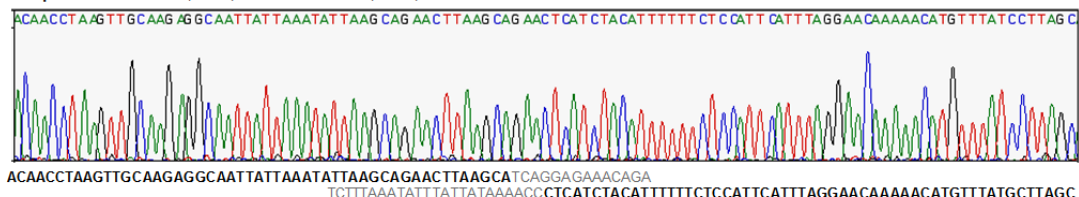

**Table.** Breakpoint identification and validation of five putative PennCNV-findings. Positions of start-SNP and end-SNPs of putative CNV calls as well as position of identified breakpoints in sequence of joining fragment were mapped on the GRCh17.p13 version of the human genome, in accordance with the SNP-annotation of the used Illumina platform.

|         |          |      | PennCNV        | PennCNV      | Estimated | Confirmed   | Confirmed   | True    |
|---------|----------|------|----------------|--------------|-----------|-------------|-------------|---------|
| Patient | CN-state | Chr. | Start-Position | End-position | Length    | Breakpoint  | Breakpoint  | Length  |
| B00ADWN | 1        | 3    | 111.897.540    | 112.056.934  | 159.394   | 111.886.897 | 112.055.840 | 168.943 |
| B00ADWN | 1        | 9    | 108.395.195    | 108.474.679  | 79.484    | 108.390.568 | 108.478.065 | 87.497  |
| B00ADXF | 1        | 9    | 703.725        | 928.456      | 224.731   | 696.335     | 926.339     | 230.004 |
| B00ADZD | 3        | 19   | 1.989.867      | 2.677.012    | 687.145   | 2.021.905   | 2.681.089   | 659.184 |
| B00ADZH | 1        | 8    | 13.968.625     | 14.086.273   | 117.648   | 13.966.251  | 14.087.785  | 121.534 |
